# Supplementary material for: ENT-A010, a Novel Steroid Derivative, Displays Neuroprotective Functions and Modulates Microglial Responses
Source: MDPI journal article supplement (doi:10.3390/biom12030424), 2022-03-09
Supplement: s1 [file s1]

## Supplementary figures

### Area % Report

Data File: C:\ChromQuest\Enterprise\Projects\Default\Method\TC\Alessia\ENT-A010\_CH3CN\_H2O\_2.dat

Method: C:\ChromQuest\Enterprise\Projects\Default\Method\TC\Alessia\Gradient\_CH3CN\_H2O\_2.met

Acquired: 10/4/2021 3:54:32 PM

Printed: 10/4/2021 4:22:23 PM

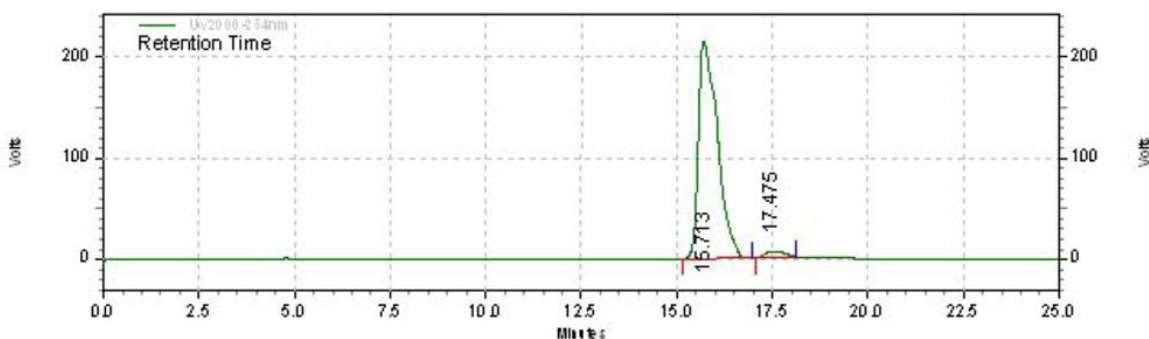

UV2000-254nm

Results (System

(10/4/2021 4:22:13

PM)

(Reprocessed))

| Retention Time | Area    | Area % | Height | Height % |
|----------------|---------|--------|--------|----------|
| 15.713         | 7461524 | 97.25  | 214472 | 97.19    |
| 17.475         | 211154  | 2.75   | 6196   | 2.81     |
| Totals         | 7672678 | 100.00 | 220668 | 100.00   |

**Figure S1.** HPLC chromatogram of compound ENT-A010. The purity of ENT-A010 was determined by high-performance liquid chromatography (HPLC) using Nucleosil 100-5 C18 HD column, 5 $\mu$ m (4.6 x 250 mm), flow rate 1 mL/min, eluting with H<sub>2</sub>O-CH<sub>3</sub>CN gradient employing UV detection at 254 nm.

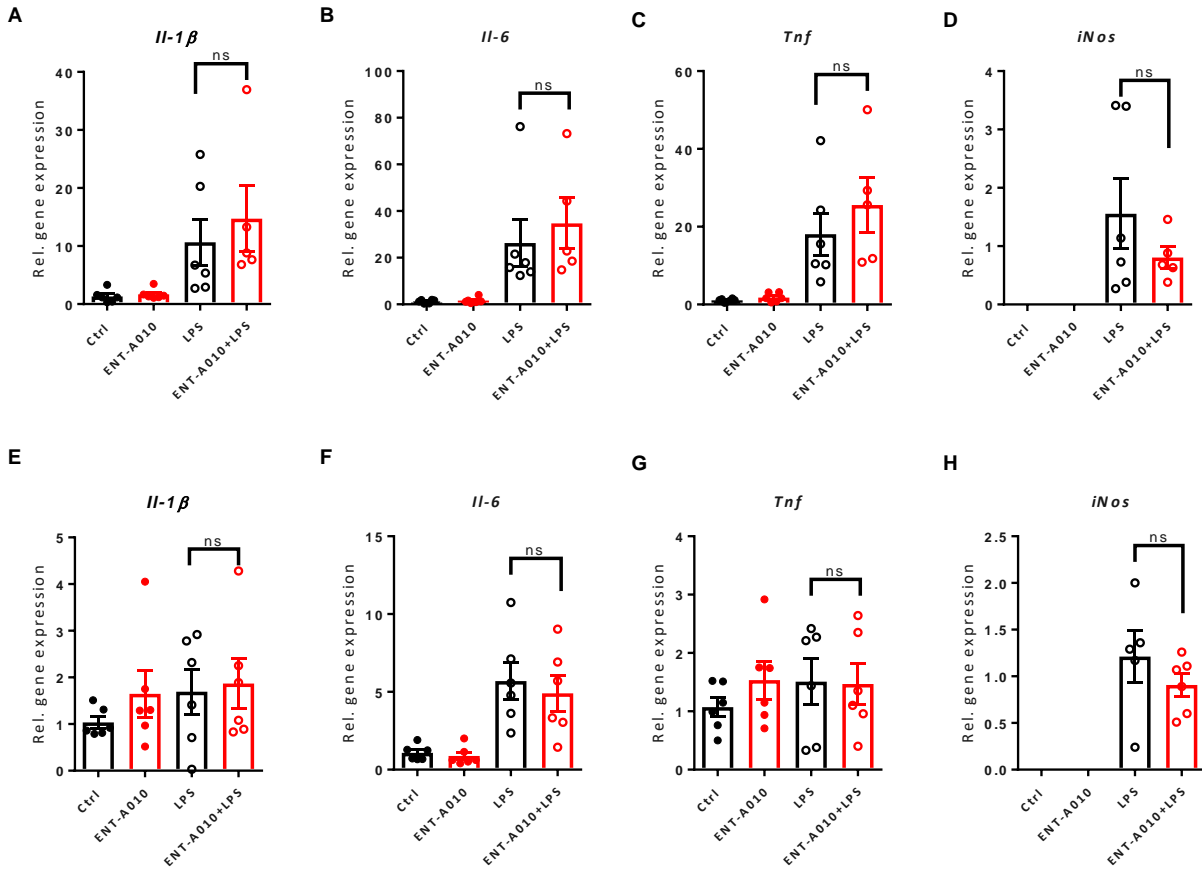

**Figure S2.** ENT-A010 does not affect inflammatory gene expression in the liver and spleen of LPS-treated mice. Mice were i.p. injected with 70 mg/kg ENT-A010 or control solution on two consecutive days. One h after the second treatment they received i.p. 3 mg/kg LPS. After 16 h livers (A-D) and spleens (E-G) were collected and whole RNA was analyzed by real-time PCR for indicated genes, using 18S as a housekeeping gene. Gene expression in the 'Ctrl' group was set as 1. Data are shown as mean  $\pm$  SEM, n=5-6 mice, ns: non-significant.

Table S1

| Gene name                      | Forward primer sequence             | Reverse primer sequence        |
|--------------------------------|-------------------------------------|--------------------------------|
| <i>18s</i>                     | 5'-GTTCCGACCATAAACGATGCC-3'         | 5'-TGGTGGTGCCCTTCCGTCAAT-3'    |
| <i>Trem2</i>                   | 5'-GTACTGGTGGAGGTGCTGGA-3'          | 5'-GGAGGTGCTGTGTTCCACTT-3'     |
| <i>Mertk</i>                   | 5'-CGGTAATAATCACCAGTGTAAATCTTTCT-3' | 5'-TTGCGGGATGACATGACTGT-3'     |
| <i>Tgfb<math>\beta</math>1</i> | 5'-TGCTCCAAACCACAGAGTAGGC-3'        | 5'-CCCAGAACACTAAGCCCATTGC-3'   |
| <i>Gpr34</i>                   | 5'-GTGCCAAATGTCAGTAGTAGCTGTCC-3'    | 5'-TCCAACCAGTCCCACGAGGAAT-3'   |
| <i>Tmem119</i>                 | 5'-ACCCAGAGCTGGTTCCATAG-3'          | 5'-GCCGGGAGTGACACAGAGTA-3'     |
| <i>Chil3</i>                   | 5'-TTCTGAATGAAGGAGCCACTGA-3'        | 5'-ACCACGGCACCTCCTCCTAAATTG-3' |
| <i>Retnla</i>                  | 5'-CTGCTACTGGGTGTGCTTGTG-3'         | 5'-GCAGTGGTCCAGTCAACGAG-3'     |
| <i>Arg1</i>                    | 5'-GAACACGGCGGCAGTGGCTTTAAC-3'      | 5'-TGCTTAGCTCTGTCTGCTTTGC-3'   |
| <i>Il-1<math>\beta</math></i>  | 5'-TGGGATGATGATGATAACCTGC-3'        | 5'-TCGTTGCTTGGTTCTCCTTGTA-3'   |
| <i>iNos</i>                    | 5'-TGCAGCAGAAGTGCAAAGTCTC-3'        | 5'-GCCATTTTGGTGACTCTTAGGG-3'   |
| <i>Il-6</i>                    | 5'-CCTTCCTACCCCAATTTCCAAT-3'        | 5'-AACGCACTAGGTTTGCCGAGTA-3'   |
| <i>Hk2</i>                     | 5'-ATCGCCTGCTTATTCACGGA-3'          | 5'-TGAGAGACGCATGTGGTAGAG-3'    |
| <i>Hif1a</i>                   | 5'-CTGTTAGGCTGGGAAAAAGTTA-3'        | 5'-ACCTTCATCGGAACTCCAAAG-3'    |
| <i>Ngf</i>                     | 5'-CATGGGGGAGTTCTCAGTGT-3'          | 5'-GCACCCACTCTCAACAGGAT-3'     |
| <i>Cx3cr1</i>                  | 5'-AGGACACAGCCAGACAAG-3'            | 5'-TCAGGGGAGAAAGCAAG-3'        |
